# Supplementary material for: Anticoagulant rodenticide exposure and toxicosis in bald eagles (Haliaeetus leucocephalus) and golden eagles (Aquila chrysaetos) in the United States
Source: PLoS One. 2021 Apr 7;16(4):e0246134. doi: 10.1371/journal.pone.0246134 (PMC8026043; doi:10.1371/journal.pone.0246134)
Supplement: S1 Data — (XLSX) [file pone.0246134.s001.xlsx]

## Sheet: Sheet1
Case	Species	Year	County	State	Age	AR status	Units	Brodifacoum	Bromadiolone	Chlorophacinone	Coumachlor	Difethialone	Diphacinone	Warfarin	Difenacoum
CC14-066	baea	2014	Wayne	PA	3 Years	Exposure	ppm	Trace	Trace	not detected	not detected	not detected	not detected	not detected	not tested
CC14-125	baea	2014	Irwin	GA	Adult	Intoxication	ppm	0.025	not detected	not detected	not detected	not detected	not detected	not detected	not tested
CC15-101	goea	2015	Eureka	NV	Juvenile	No Exposure	ppm	not detected	not detected	not detected	not detected	not detected	not detected	not detected	not detected
CC15-120	baea	2015	Monroe	PA	Adult	Exposure	ppm	0.025	0.078	not detected	not detected	0.97	not detected	not detected	not detected
CC15-149	baea	2015	Miami-Dade	FL	<1 Year	No Exposure	ppm	not detected	not detected	not detected	not detected	not detected	not detected	not detected	not detected
CC15-156	goea	2015	San Juan	NM	3 Years	No Exposure	ppm	not detected	not detected	not detected	not detected	not detected	not detected	not detected	not detected
CC15-188	baea	2015	Onslow	NC	Adult	Exposure	ppm	Trace	not detected	not detected	not detected	not detected	not detected	not detected	not detected
CC15-237	baea	2015	Williamsburg	SC	1 Year	Exposure	ppm	Trace	not detected	not detected	not detected	not detected	not detected	not detected	not detected
CC15-238	baea	2015	Chatham	GA	1 Year	No Exposure	ppm	not detected	not detected	not detected	not detected	not detected	not detected	not detected	not detected
CC15-248	baea	2015	Monroe	PA	Adult	Intoxication	ppm	Trace	not detected	not detected	not detected	not detected	not detected	not detected	not detected
CC15-275	goea	2015	Kimball	NE	Juvenile	Exposure	ppm	not detected	not detected	Trace	not detected	not detected	Trace	not detected	not detected
CC15-311	baea	2015	Perquimans	NC	Adult	Exposure	ppm	0.077	not detected	not detected	not detected	not detected	not detected	not detected	not detected
CC15-343	baea	2015	Lawrence	PA	1 Year	Exposure	ppm	0.039	Trace	not detected	not detected	not detected	not detected	not detected	not detected
CC15-344	baea	2015	Crawford	PA	3 Years	Exposure	ppm	0.032	not detected	not detected	not detected	not detected	not detected	not detected	not detected
CC15-345	baea	2015	Jefferson	PA	<1 Year	No Exposure	ppm	not detected	not detected	not detected	not detected	not detected	not detected	not detected	not detected
CC15-346	baea	2015	Crawford	PA	4 Years	Exposure	ppm	0.096	not detected	not detected	not detected	not detected	not detected	not detected	not detected
CC15-355	baea	2015	Banks	GA	Juvenile	No Exposure	ppm	not detected	not detected	not detected	not detected	not detected	not detected	not detected	not detected
CC15-359	goea	2015	Park	WY	<1 Year	Exposure	ppm	0.09	not detected	not detected	not detected	not detected	not detected	not detected	not detected
CC15-362	baea	2015	Blair	PA	Unknown	Exposure	ppm	Trace	not detected	not detected	not detected	not detected	not detected	not detected	not detected
CC15-363	baea	2015	Cumberland	PA	Juvenile	Exposure	ppm	Trace	not detected	not detected	not detected	not detected	not detected	not detected	not detected
CC15-432	baea	2015	Northumberland	PA	Juvenile	No Exposure	ppm	not detected	not detected	not detected	not detected	not detected	not detected	not detected	not detected
CC15-517	baea	2015	Lee	FL	30 Years	Exposure	ppm	0.072	not detected	not detected	not detected	not detected	not detected	not detected	not detected
CC15-533	baea	2015	Wood	WV	5 Years	No Exposure	ppm	not detected	not detected	not detected	not detected	not detected	not detected	not detected	not detected
CC15-542	baea	2015	Lancaster	PA	Adult	Exposure	ppm	Trace	not detected	not detected	not detected	Trace	not detected	not detected	not detected
CC15-545	baea	2015	Terrebonne	LA	Adult	Exposure	ppm	Trace	not detected	not detected	not detected	not detected	not detected	not detected	not detected
CC15-556	goea	2015	Sanpete	UT	1.5 Years	Exposure	ppm	not detected	Trace	not detected	not detected	not detected	not detected	not detected	not detected
CC15-578	goea	2015	Columbia	WA	<1 Year	Exposure	ppm	Trace	not detected	not detected	not detected	not detected	not detected	not detected	not detected
CC15-583	baea	2015	Campbell	VA	Adult	Exposure	ppm	Trace	not detected	not detected	not detected	Trace	not detected	not detected	not detected
CC15-60	goea	2015	Clark	NV	Adult	Exposure	ppm	0.039	0.061	not detected	not detected	not detected	Trace	not detected	not detected
CC15-603	baea	2015	Seminole	FL	Adult	Exposure	ppm	Trace	not detected	not detected	not detected	not detected	not detected	not detected	not detected
CC15-604	baea	2015	Osceola	FL	Adult	Exposure	ppm	Trace	Trace	not detected	not detected	not detected	not detected	not detected	not detected
CC15-608	baea	2015	N/A	PA	Juvenile	No Exposure	ppm	not detected	not detected	not detected	not detected	not detected	not detected	not detected	not detected
CC15-609	baea	2015	Susquehanna	PA	Adult	Exposure	ppm	0.072	not detected	not detected	not detected	not detected	not detected	not detected	not detected
CC15-640	baea	2015	Washington	GA	Adult	Exposure	ppm	Trace	0.23	not detected	not detected	not detected	not detected	not detected	not detected
CC16-010	baea	2016	Berkeley	SC	Adult	Exposure	ppm	Trace	not detected	not detected	not detected	not detected	not detected	not detected	not detected
CC16-013	baea	2016	Owen	KY	5 Years	Exposure	ppm	100	not detected	not detected	not detected	Trace	not detected	not detected	not detected
CC16-040	baea	2016	Alachua	FL	Adult	Exposure	ppm	Trace	not detected	not detected	not detected	not detected	not detected	not detected	not detected
CC16-041	baea	2016	Manatee	FL	2 Years	Exposure	ppm	Trace	not detected	not detected	not detected	not detected	not detected	not detected	not detected
CC16-042	baea	2016	Pinellas	FL	Adult	Intoxication	ppm	96	Trace	not detected	not detected	not detected	not detected	not detected	not detected
CC16-045	goea	2016	Sullivan	PA	Juvenile	Exposure	ppm	Trace	Trace	not detected	not detected	not detected	not detected	not detected	not detected
CC16-048	baea	2016	Fulton	PA	Adult	Exposure	ppb	53	not detected	not detected	not detected	Trace	not detected	not detected	not detected
CC16-049	goea	2016	Mifflin	PA	Adult	Exposure	ppb	Trace	not detected	not detected	not detected	Trace	not detected	not detected	not detected
CC16-050	baea	2016	Carroll	GA	Adult	Exposure	ppb	Trace	not detected	not detected	not detected	not detected	not detected	not detected	not detected
CC16-067	baea	2016	Schuykill	PA	Adult	Exposure	ppb	Trace	not detected	not detected	not detected	not detected	not detected	not detected	not detected
CC16-073	baea	2016	Pike	PA	Adult	Exposure	ppb	Trace	not detected	not detected	not detected	not detected	not detected	not detected	not detected
CC16-075	baea	2016	Volusia	FL	2.5 Years	Exposure	ppb	Trace	not detected	not detected	not detected	not detected	not detected	not detected	not detected
CC16-079	baea	2016	Tattnall	GA	2 Years	Exposure	ppb	Trace	not detected	not detected	not detected	not detected	not detected	not detected	not detected
CC16-088 (A)	baea	2016	York	PA	4 Years	Exposure	ppb	Trace	not detected	not detected	not detected	not detected	not detected	not detected	not detected
CC16-088 (B)	baea	2016	York	PA	1 Year	Exposure	ppb	Trace	not detected	not detected	not detected	Trace	not detected	not detected	not detected
CC16-101	baea	2016	Seminole	FL	<1 Year	No Exposure	ppb	not detected	not detected	not detected	not detected	not detected	not detected	not detected	not detected
CC16-106 (A)	baea	2016	N/A	PA	Juvenile	No Exposure	ppb	not detected	not detected	not detected	not detected	not detected	not detected	not detected	not detected
CC16-106 (B)	baea	2016	N/A	PA	Juvenile	No Exposure	ppb	not detected	not detected	not detected	not detected	not detected	not detected	not detected	not detected
CC16-106 (c)	baea	2016	N/A	PA	Adult	Exposure	ppb	Trace	not detected	not detected	not detected	not detected	not detected	not detected	not detected
CC16-115	baea	2016	Clark/Hot Spring	AR	Adult	Exposure	ppm	Trace	Trace	not detected	not detected	not detected	not detected	not detected	not detected
CC16-146	goea	2016	Eureka	NV	<1 Year	No Exposure	ppb	not detected	not detected	not detected	not detected	not detected	not detected	not detected	not detected
CC16-148	baea	2016	Alachua	FL	Juvenile	No Exposure	ppb	not detected	not detected	not detected	not detected	not detected	not detected	not detected	not detected
CC16-152	baea	2016	Crawford	PA	<1 Year	Intoxication	ppb	170	not detected	not detected	not detected	not detected	not detected	not detected	not detected
CC16-174	baea	2016	Wakulla	FL	3 Years	Exposure	ppb	Trace	not detected	not detected	not detected	Trace	not detected	not detected	not detected
CC16-188	goea	2016	Pendleton	WV	Adult	Exposure	ppb	78	Trace	not detected	not detected	not detected	not detected	not detected	not detected
CC16-191	baea	2016	Muhlenberg	KY	Adult	Exposure	ppm	Trace	not detected	not detected	not detected	not detected	not detected	not detected	not detected
CC16-192	baea	2016	N/A	KY	Adult	Exposure	ppm	Trace	not detected	not detected	not detected	not detected	not detected	not detected	not detected
CC16-212	baea	2016	Putnam	FL	Adult	Exposure	ppb	Trace	Trace	not detected	not detected	not detected	not detected	not detected	Trace
CC16-257	baea	2016	Seminole	FL	Juvenile	No Exposure	ppm	not detected	not detected	not detected	not detected	not detected	not detected	not detected	not detected
CC16-271	baea	2016	Erie	PA	Adult	Exposure	ppb	Trace	not detected	not detected	not detected	not detected	not detected	not detected	not detected
CC16-272	baea	2016	Orange	FL	Adult	Exposure	ppm	Trace	not detected	not detected	not detected	not detected	not detected	not detected	not detected
CC16-277	baea	2016	Highlands	FL	Juvenile	No Exposure	ppb	not detected	not detected	not detected	not detected	not detected	not detected	not detected	not detected
CC16-286	baea	2016	Bedford	PA	Juvenile	Exposure	ppm	Trace	not detected	not detected	not detected	not detected	not detected	not detected	not detected
CC16-287	baea	2016	Bedford	PA	Juvenile	Exposure	ppm	Trace	not detected	not detected	not detected	not detected	not detected	not detected	not detected
CC16-295	goea	2016	Matanuska Susitna	AK	Juvenile	No Exposure	ppm	not detected	not detected	not detected	not detected	not detected	not detected	not detected	not detected
CC16-313	baea	2016	Bedford	PA	Juvenile	No Exposure	ppb	not detected	not detected	not detected	not detected	not detected	not detected	not detected	not detected
CC16-318	baea	2016	Collier	FL	3 Years	Exposure	ppb	Trace	Trace	Trace	not detected	Trace	not detected	not detected	Trace
CC16-339	baea	2016	Osceola	FL	Adult	Exposure	ppb	200	260	not detected	not detected	Trace	not detected	not detected	not detected
CC16-393 (A)	baea	2016	Crawford	PA	3 Years	Exposure	ppb	63	not detected	not detected	not detected	not detected	not detected	not detected	not detected
CC16-393 (B)	baea	2016	Crawford	PA	3 Years	Exposure	ppb	Trace	not detected	not detected	not detected	not detected	not detected	not detected	not detected
CC16-459	baea	2016	Pinellas	FL	3 Years	Exposure	ppb	130	not detected	not detected	not detected	not detected	not detected	not detected	Trace
CC16-575	baea	2016	Alachua	FL	Adult	Exposure	ppb	Trace	not detected	not detected	not detected	not detected	not detected	not detected	not detected
CC16-588	baea	2016	Manatee	FL	Adult	Exposure	ppm	Trace	not detected	not detected	not detected	not detected	not detected	not detected	not detected
CC16-632	goea	2016	Roosevelt	NM	2 Years	Exposure	ppb	Trace	Trace	not detected	not detected	not detected	not detected	not detected	not detected
CC16-638	baea	2016	Orange	FL	Adult	Exposure	ppb	180	Trace	not detected	not detected	Trace	not detected	not detected	not detected
CC16-654	baea	2016	Orange	FL	Adult	Exposure	ppb	250	not detected	not detected	not detected	not detected	not detected	not detected	not detected
CC16-662	baea	2016	Collier	FL	2 Years	Exposure	ppb	Trace	160	not detected	not detected	Trace	not detected	not detected	not detected
CC16-672	baea	2016	Collier	FL	Adult	Intoxication	ppb	490	85	not detected	not detected	Trace	not detected	not detected	not detected
CC16-691	goea	2016	Saguache	CO	2 Years	Exposure	ppb	140	62	not detected	not detected	not detected	not detected	not detected	Trace
CC16-695 (A)	baea	2016	Lincoln	GA	3 Years	Exposure	ppb	Trace	not detected	not detected	not detected	not detected	not detected	not detected	not detected
CC16-704	baea	2016	Orange	FL	Adult	Exposure	ppb	Trace	62	not detected	not detected	not detected	not detected	not detected	not detected
CC17-003	baea	2017	Miami-Dade	FL	Adult	Exposure	ppb	Trace	Trace	not detected	not detected	not detected	not detected	not detected	not detected
CC17-016	baea	2017	Lafayette	FL	Adult	Exposure	ppb	72	not detected	not detected	not detected	not detected	not detected	not detected	Trace
CC17-022	baea	2017	Berks	PA	Juvenile	Exposure	ppb	240	not detected	not detected	not detected	not detected	not detected	not detected	Trace
CC17-026	baea	2017	Polk	FL	Adult	Exposure	ppb	Trace	not detected	not detected	not detected	not detected	not detected	not detected	not detected
CC17-043	baea	2017	Poke	FL	Adult	Exposure	ppb	Trace	not detected	not detected	not detected	not detected	not detected	not detected	not detected
CC17-044	goea	2017	Clinch	GA	Adult	Exposure	ppb	Trace	not detected	not detected	not detected	not detected	not detected	not detected	not detected
CC17-049	baea	2017	Collier	FL	Adult	Exposure	ppb	650	not detected	not detected	not detected	not detected	not detected	not detected	not detected
CC17-070	baea	2017	Orange	FL	Adult	Exposure	ppb	Trace	not detected	not detected	not detected	not detected	not detected	not detected	not detected
CC17-073	goea	2017	Socorro	NM	3 Years	Exposure	ppb	Trace	Trace	not detected	not detected	not detected	not detected	not detected	Trace
CC17-089	baea	2017	Mercer	PA	Juvenile	Exposure	ppb	Trace	not detected	not detected	not detected	not detected	not detected	not detected	not detected
CC17-096	baea	2017	Seminole	FL	Adult	No Exposure	ppb	not detected	not detected	not detected	not detected	not detected	not detected	not detected	not detected
CC17-099	baea	2017	Sarasota	FL	Adult	Exposure	ppb	120	Trace	not detected	not detected	not detected	not detected	not detected	Trace
CC17-112	goea	2017	Lake	OR	3 Years	Intoxication	ppb	Trace	Trace	not detected	not detected	not detected	not detected	not detected	not detected
CC17-149	baea	2017	Gulf	FL	Adult	Intoxication	ppb	Trace	not detected	not detected	not detected	not detected	not detected	not detected	not detected
CC17-219A	baea	2017	Adair	KY	Adult	Exposure	ppb	Trace	not detected	not detected	not detected	not detected	not detected	not detected	not detected
CC17-219B	baea	2017	Daviess	KY	Adult	Exposure	ppb	Trace	not detected	not detected	not detected	Trace	not detected	not detected	not detected
CC17-219C	baea	2017	Trigg	KY	Adult	Exposure	ppb	Trace	not detected	not detected	not detected	not detected	not detected	not detected	not detected
CC17-219D	baea	2017	Trigg	KY	Not recorded	Exposure	ppb	Trace	not detected	not detected	not detected	not detected	not detected	not detected	not detected
CC17-219E	baea	2017	Russell	KY	Adult	Exposure	ppb	Trace	not detected	not detected	not detected	not detected	not detected	not detected	not detected
CC17-219F	baea	2017	Edmonson	KY	Adult	Exposure	ppb	Trace	not detected	not detected	not detected	not detected	not detected	not detected	not detected
CC17-219G	baea	2017	Edmonson	KY	<1 Year	No Exposure	ppb	not detected	not detected	not detected	not detected	not detected	not detected	not detected	not detected
CC17-219H	baea	2017	Union	KY	<1 Year	No Exposure	ppb	not detected	not detected	not detected	not detected	not detected	not detected	not detected	not detected
CC17-221	baea	2017	Okeechobee	FL	Adult	No Exposure	ppb	not detected	not detected	not detected	not detected	not detected	not detected	not detected	not detected
CC17-236	baea	2017	St. Lucie	FL	Adult	Exposure	ppb	130	Trace	not detected	not detected	Trace	not detected	not detected	Trace
CC17-327	baea	2017	Monroe	FL	1 Year	Exposure	ppb	340	not detected	not detected	not detected	not detected	not detected	not detected	Trace
CC17-337	baea	2017	Orange	FL	<1 Year	Exposure	ppb	not detected	not detected	not detected	not detected	Trace	not detected	not detected	not detected
CC17-569	baea	2017	Brevard	FL	<1 Year	Exposure	ppb	Trace	180	not detected	not detected	not detected	not detected	not detected	not detected
CC17-641	baea	2017	Palm Beach	FL	Juvenile	No Exposure	ppb	not detected	not detected	not detected	not detected	not detected	not detected	not detected	not detected
CC17-663	baea	2017	Polk	FL	Adult	Exposure	ppb	Trace	not detected	not detected	not detected	not detected	not detected	not detected	not detected
CC17-676	baea	2017	Charlotte	FL	Adult	Exposure	ppb	77	Trace	not detected	not detected	not detected	not detected	not detected	Trace
CC17-729	baea	2017	Pasco	FL	Adult	Exposure	ppb	500	97	not detected	not detected	not detected	not detected	not detected	Trace
CC17-774	baea	2017	Orange	FL	Adult	Exposure	ppb	Trace	not detected	not detected	not detected	not detected	not detected	not detected	not detected
CC18-009A	baea	2018	York	PA	Adult	Intoxication	ppb	69	not detected	not detected	not detected	Trace	not detected	not detected	not detected
CC18-022	baea	2018	Mercer	PA	Juvenile	Exposure	ppb	Trace	310	not detected	not detected	not detected	not detected	not detected	not detected
CC18-035	baea	2018	Volusia	FL	Adult	Exposure	ppb	Trace	not detected	not detected	not detected	not detected	not detected	not detected	not detected
CC18-045	baea	2018	Pinellas	FL	Adult	Exposure	ppb	720	not detected	not detected	not detected	not detected	not detected	not detected	not detected
CC18-056A	baea	2018	Seminole	GA	Adult	Intoxication	ppb	Trace	Trace	not detected	not detected	Trace	not detected	not detected	not detected
CC18-085	baea	2018	Hillsborough	FL	Adult	Exposure	ppb	Trace	not detected	not detected	not detected	not detected	not detected	not detected	not detected
CC18-088	baea	2018	Allen	KY	Adult	Intoxication	ppb	77	not detected	not detected	not detected	not detected	not detected	not detected	not detected
CC18-092C	baea	2018	Decatur	GA	Adult	Intoxication	ppb	Trace	not detected	not detected	not detected	Trace	not detected	not detected	not detected
CC18-098	baea	2018	Orange	FL	Adult	Exposure	ppb	Trace	Trace	not detected	not detected	not detected	trace	not detected	not detected
CC18-123	baea	2018	Franklin	KY	Adult	Exposure	ppb	Trace	96	not detected	not detected	not detected	not detected	not detected	not detected
CC18-262	baea	2018	Lee	FL	Adult	Intoxication	ppb	760	not detected	not detected	not detected	Trace	not detected	not detected	Trace
CC18-449	baea	2018	Bradford	PA	Adult	Exposure	ppb	Trace	not detected	not detected	not detected	not detected	not detected	not detected	not detected
CC18-497	baea	2018	Tattnall	GA	Adult	Exposure	ppb	Trace	not detected	not detected	not detected	not detected	not detected	not detected	not detected
CC18-540	baea	2018	Lee	FL	Adult	Exposure	ppb	Trace	not detected	not detected	not detected	190	not detected	not detected	not detected
CC18-698	baea	2018	Taylor	FL	Adult	Exposure	ppb	Trace	not detected	not detected	not detected	Trace	not detected	not detected	not detected
CC18-709	baea	2018	Collier	FL	Adult	Exposure	ppb	58	Trace	not detected	not detected	not detected	not detected	not detected	not detected
